# Supplementary material for: Subcellular Epithelial HMGB1 Expression Is Associated with Colorectal Neoplastic Progression, Male Sex, Mismatch Repair Protein Expression, Lymph Node Positivity, and an ‘Immune Cold’ Phenotype Associated with Poor Survival
Source: MDPI journal article supplement (doi:10.3390/cancers15061865), 2023-03-20

## **SUPPLEMENTARY FILES - MATERIALS, TABLES AND DATA**

### **Supplementary File S1 – page 2**

Table: Colorectal cancer TMA with clinico- pathological data

### **Supplementary File S2 – page 3**

Characterisation of adenomatous and cancer polyp cohorts

### **Supplementary File S3 – page 5**

Table: Antibodies for immunohistochemistry

### **Supplementary File S4 – page 6**

Representative high power field photomicrographs of different HMGB1 epithelial nuclear and cytoplasmic staining intensities.

### **Supplementary File S5 – page 7**

Table: Association between epithelial HMGB1 expression in colonic cancer and clinico-pathological parameters.

### **Supplementary File S6 – page 8**

Association between HMGB1 and overall survival in colorectal cancer

### **Supplementary File S7 – page 10**

Cancer polyp validation cohort with molecular data

### **Supplementary File S8 – page 12**

Immune cell infiltrate at the invasive cancer margin of colorectal cancer polyps

### **Supplementary File S9 – page 13**

Association between immune microenvironment and overall survival in colorectal cancer

**Supplementary File S1 – Table: Colorectal cancer TMA with clinico- pathological data**

| Characteristic                                                   | No patients | Percentage | Relationship with survival                                                                                                                   |
|------------------------------------------------------------------|-------------|------------|----------------------------------------------------------------------------------------------------------------------------------------------|
| Sex                                                              |             |            |                                                                                                                                              |
| Male                                                             | 340         | 52.3       | $\chi^2= 0.027$ , $p=0.870$                                                                                                                  |
| Female                                                           | 310         | 47.7       |                                                                                                                                              |
| Age                                                              |             |            |                                                                                                                                              |
| <70                                                              | 305         | 46.9       | $\chi^2=29.213$ , $p<0.001$                                                                                                                  |
| $\geq 70$                                                        | 345         | 53.1       |                                                                                                                                              |
| Screening Detected                                               |             |            |                                                                                                                                              |
| Yes                                                              | 52          | 8          | $\chi^2=16.381$ , $p<0.001$                                                                                                                  |
| No                                                               | 598         | 92         |                                                                                                                                              |
| Tumour Site                                                      |             |            |                                                                                                                                              |
| Proximal colon                                                   | 261         | 40.2       | Proximal v distal, $\chi^2= 8.418$ , $p=0.004$<br>Distal v rectal, $\chi^2= 0.906$ , $p=0.341$<br>Colon v rectum, $\chi^2=0.098$ , $p=0.754$ |
| Distal colon                                                     | 245         | 37.7       |                                                                                                                                              |
| Rectum                                                           | 144         | 22.2       |                                                                                                                                              |
| Tumour Differentiation                                           |             |            |                                                                                                                                              |
| Well/Moderate                                                    | 600         | 92.3       | $\chi^2=0.976$ , $p=0.323$                                                                                                                   |
| Poor                                                             | 50          | 7.7        |                                                                                                                                              |
| Extra-Mural Venous Invasion                                      |             |            |                                                                                                                                              |
| Present                                                          | 140         | 21.5       | $\chi^2=100.946$ , $p<0.001$                                                                                                                 |
| Absent                                                           | 510         | 78.5       |                                                                                                                                              |
| Mismatch Repair Protein Status (defined by MLH1 and MSH2 status) |             |            |                                                                                                                                              |
| Deficient                                                        | 96          | 15.2       | $\chi^2=2.848$ , $p=0.091$                                                                                                                   |
| Proficient                                                       | 536         | 84.8       |                                                                                                                                              |
| pT Stage                                                         |             |            |                                                                                                                                              |
| T1                                                               | 30          | 4.6        | T1 v T2, $\chi^2=0.382$ , $p=0.536$<br>T2 v T3, $\chi^2=24.739$ , $p<0.001$<br>T3 v T4, $\chi^2=30.159$ , $p<0.001$                          |
| T2                                                               | 114         | 17.5       |                                                                                                                                              |
| T3                                                               | 411         | 63.2       |                                                                                                                                              |
| T4                                                               | 95          | 14.6       |                                                                                                                                              |
| pN Stage                                                         |             |            |                                                                                                                                              |
| N0                                                               | 364         | 56         | N0 v N1, $\chi^2=54.071$ , $p<0.001$<br>N1 v N2, $\chi^2=17.636$ , $p<0.001$                                                                 |
| N1                                                               | 177         | 27.2       |                                                                                                                                              |
| N2                                                               | 109         | 16.8       |                                                                                                                                              |
| Dukes Stage                                                      |             |            |                                                                                                                                              |
| A                                                                | 120         | 18.5       | A v B, $\chi^2=5.059$ , $p=0.025$<br>B v C, $\chi^2=65.510$ , $p<0.001$                                                                      |
| B                                                                | 244         | 37.5       |                                                                                                                                              |
| C                                                                | 286         | 44         |                                                                                                                                              |

## **Supplementary File S2 – Characterisation of adenomatous and cancer polyp cohorts**

### ***Adenomatous Polyps***

Clinico-pathological data were available for 52/52 (100%) adenomatous polyps. Non-cancerous adenomatous polyps were retrieved from 19 (37%) female and 33 (63%) male patients, with a median age of 61 (75, 68) years. Site was from the colon in 43 (82%), rectum in 5 (10%), and rectosigmoid junction in 4 (8%) patients. Of colonic adenomas, 26 (60%) were from the sigmoid, 7 (17%) were from the ascending colon, 6 (14%) were from the transverse colon, 3 (7%) were from the descending colon, and 1 (2%) was not accurately reported. Histology reported 31 (60%) as tubular, 14 (27%) as tubulovillous, 5 (9%) as serrated or sessile, and 2 (4%) were not reported accurately. 46 (88%) had low grade and 6 (12%) had high grade dysplasia. The median size was 9.5 (6.3, 12) mm, at the largest measurement. 17 (33%) patients with polyps were identified by the NHS Scotland Bowel Screening Program, whereas this was not true (or not documented) for 35 (67%) patients.

### ***Initial Cancer Polyp (CaP) Cohort***

Clinico-pathological data were available for 24/28 (86%) colorectal cancer polyps (CaP). CaP were retrieved from 8 (33%) female and 16 (67%) male patients, with a median age of 72.5 (70.25, 75) years. Polyp site was unknown for 3 (12%), from the colon in 15 (63%), and from the rectum in 6 (25%) patients. Of colonic CaP, 11 (73%) were from the sigmoid, 2 (12%) were from the transverse colon, 1 (7%) was from the descending colon, and 1 (7%) was unspecified. Background polyp histology reported 9 (38%) as tubular, 2 (8%) as tubulovillous, 2 (8%) as sessile, 1 (4%) as sessile tubular, 1 (4%) as ulcerated and 9 (38%) as unknown. Dysplasia within the CaP was reported as 'high' for 9 (38%), 'low' for 4 (17%), 'mostly low with foci of high' for 5 (20%), 'moderate' for 2 (8%), or unknown for 4 (17%). The median CaP size was 12 (10.5, 16) mm, at the largest measurement. 11 (46%) patients with CaP were identified via the NHS Scotland Bowel Screening Program, whereas this was not true (or not documented) for 13 (54%) patients. 3 patients were noted to have diverticulosis; no patients were reported to have inflammatory bowel diseases or genetic colorectal cancer syndromes such as Familial Adenomatous Polyposis or Hereditary Non-Polyposis Colorectal Cancer.

### ***Validation Cancer Polyp (CaP) Cohort***

Aberrant HMGB1 expression was observed at the invasive cancer margin in our initial CaP cohort (n=28). We wanted to confirm this in a validation cohort, and investigate whether HMGB1 expression was associated with molecular markers.

41 CaP lesions were obtained from 33/41 (80.5%) patients *via* endoscopic polypectomy, 4/41 (9.8%) patients *via* endoscopic mucosal resection polypectomy, and 4/41 (9.8%) patients *via* transanal minimally invasive surgery polypectomy. 17/41 (41.5%) were detected through the NHS Scotland Bowel Cancer Screening Programme.

CaPs were removed from the rectum in 13 (31.7%) patients, recto-sigmoid junction in 2 (4.9%) patients, sigmoid colon in 21 (51.2%) patients, descending colon in 3 (7.3%) patients, splenic flexure in 1 (2.4%) patient, and ascending colon in 1 (2.4%) patient. Polyp size was <10mm for 1 (2.4%) patient, 10-20mm for 29 (70.7%) patients, ≥ 20mm for 10 (24.4%) patients, and

unknown for 1 (2.4%) patient. While only one CaP was identified and included for analysis, some patients had synchronous polyps resected. The number of polyps resected per patient was unknown ('multiple mucosal fragments') for 1 (2.4%) patient, one for 36 (87.8%) patients, two for 2 (4.9%) patients, three for 1 (2.4%) patient, and four for 1 (2.4%) patient. Background adenomatous tissue in CaP was reported as tubular for 11 (26.8%) CaP, tubulo-villous for 11 (26.8%) CaP, sessile serrated for 1 (2.4%) CaP, and unspecified for 18 (43.9%) CaP. All foci of cancer were adenocarcinoma.

*KRAS*, *BRAF*, *EGFR* and MSI status were available for most tumours. MSI status was not tested in 17 (41.5%) CaP, proficient in 21 (51.2%) CaP, deficient in 1 (2.4%) CaP, and inconclusive/poor quality in 2 (4.9%) CaP. *KRAS* status was not tested in 16 (39%) CaP, wildtype in 11 (26.8%) CaP, mutated in 13 (31.7%) CaP, or inconclusive/poor quality in 2 (4.9%) CaP. Specifically, 3 (23%) *KRAS* mutations were c.35G>A; p.(Gly12Asp), 3 (23%) were c.35G>T;p.(Gly12Val), 3 (23%) were c.38G>A;p.(Gly13Asp), 1 (8%) was c.34G>T;p.Gly12Cys, 1 (8%) was c.182A>G; p.(Gln61Arg), 1 (8%) was c.348\_349insG; p.(Lys117Glufs\*3), and 1 (8%) was mutation in codon 12. *BRAF* status was not tested in 17 (41.5%) CaP, not mutated in 23 (56.1%) CaP, and inconclusive or poor quality in 1 (2.4%) CaP. *EGFR* status was not tested in 35 (85.4%) CaP, not expressed 1 (2.4%) CaP, expressed in 4 (9.8%) CaP, and inconclusive or poor quality in 1 (2.4%) CaP.

**Supplementary File S3 – Table: Antibodies for immunohistochemistry**

| Antibody target                                                                                                                                       | Antibody type     | Antigen retrieval | Dilution | Incubation time (min) | Positive control                    | Supplier        | Code       | Isotype, clone |
|-------------------------------------------------------------------------------------------------------------------------------------------------------|-------------------|-------------------|----------|-----------------------|-------------------------------------|-----------------|------------|----------------|
| HMGB1                                                                                                                                                 | rabbit monoclonal | citrate           | 1:400    | 60                    | colorectal cancer                   | abcam           | ab79823    | IgG, EPR3507   |
| p53                                                                                                                                                   | mouse monoclonal  | EDTA              | 1:250    | 60                    | Barrett's oesophagus with dysplasia | abcam           | ab1101     | IgG2a, DO-1    |
| RUNX3                                                                                                                                                 | mouse monoclonal  | EDTA              | 1:500    | 60                    | colorectal cancer                   | abcam           | ab40278    | IgG1, R3-5G4   |
| CD20+ B-cells                                                                                                                                         | mouse monoclonal  | citrate           | 1:600    | 60                    | tonsil                              | Agilent         | M 075529-2 | IgG2a, L26     |
| CD4+ T-cells                                                                                                                                          | mouse monoclonal  | EDTA              | 1:500    | 60                    | tonsil                              | abcam           | ab133616   | IgG, EPR6855   |
| CD8+ T-cells                                                                                                                                          | mouse monoclonal  | EDTA              | 1:150    | 60                    | tonsil                              | abcam           | ab17147    | IgG1, 144B     |
| FOXP3+ T-cells                                                                                                                                        | mouse monoclonal  | EDTA              | 1:200    | 60                    | tonsil                              | abcam           | ab20034    | IgG1, 236A/E7  |
| CD68+ macrophages                                                                                                                                     | mouse monoclonal  | EDTA              | 1:100    | 60                    | tonsil                              | abcam           | ab955      | IgG1, KP1      |
| <b><i>Antibodies used for assessment of lymphocyte infiltrate and immune checkpoint biomarkers in the colorectal cancer TMA from<sup>17</sup></i></b> |                   |                   |          |                       |                                     |                 |            |                |
| CD3+ T-cells                                                                                                                                          | rabbit monoclonal | CC1               | Neat     | 32                    | tonsil                              | Ventana         | 790-4341   | IgG, 2GV6      |
| CD4+ T-cells                                                                                                                                          | rabbit monoclonal | CC1               | Neat     | 60                    | tonsil                              | Ventana         | 790-4423   | IgG, SP35      |
| CD8+ T-cells                                                                                                                                          | mouse monoclonal  | ER2               | 1:50     | 20                    | tonsil                              | Dako            | M7103      | IgG1, CD/144B  |
| FoxP3+ T-cells                                                                                                                                        | rabbit monoclonal | CC1               | 1:50     | 48                    | tonsil                              | LSBio           | LS-C210349 | IgG, SP97      |
| CD20+ B-cells                                                                                                                                         | mouse monoclonal  | ER1               | 1:400    | 30                    | tonsil                              | Dako            | M0755      | IgG2a, L26     |
| IDO-1                                                                                                                                                 | rabbit monoclonal | ER2               | 1:400    | 20                    | tonsil                              | Cell Signalling | #86630     | IgG, D5J4E     |
| ICOS                                                                                                                                                  | rabbit monoclonal | ER2               | 1:400    | 20                    | tonsil                              | Cell Signalling | #89601     | IgG, D1K2T     |
| PDL-1                                                                                                                                                 | rabbit monoclonal | CC1               | Neat     | 64                    | tonsil                              | Ventana         | 790-4905   | IgG, SP263     |

**Supplementary File S4.** Representative high power field photomicrographs of (A) weak nuclear and absent cytoplasmic (B) moderate nuclear and absent cytoplasmic (C) strong nuclear and absent cytoplasmic (D) strong nuclear and weak cytoplasmic (E) absent nuclear and moderate cytoplasmic (note blood vessel has very strong non-specific staining) and (F) strong nuclear and strong cytoplasmic staining intensities.

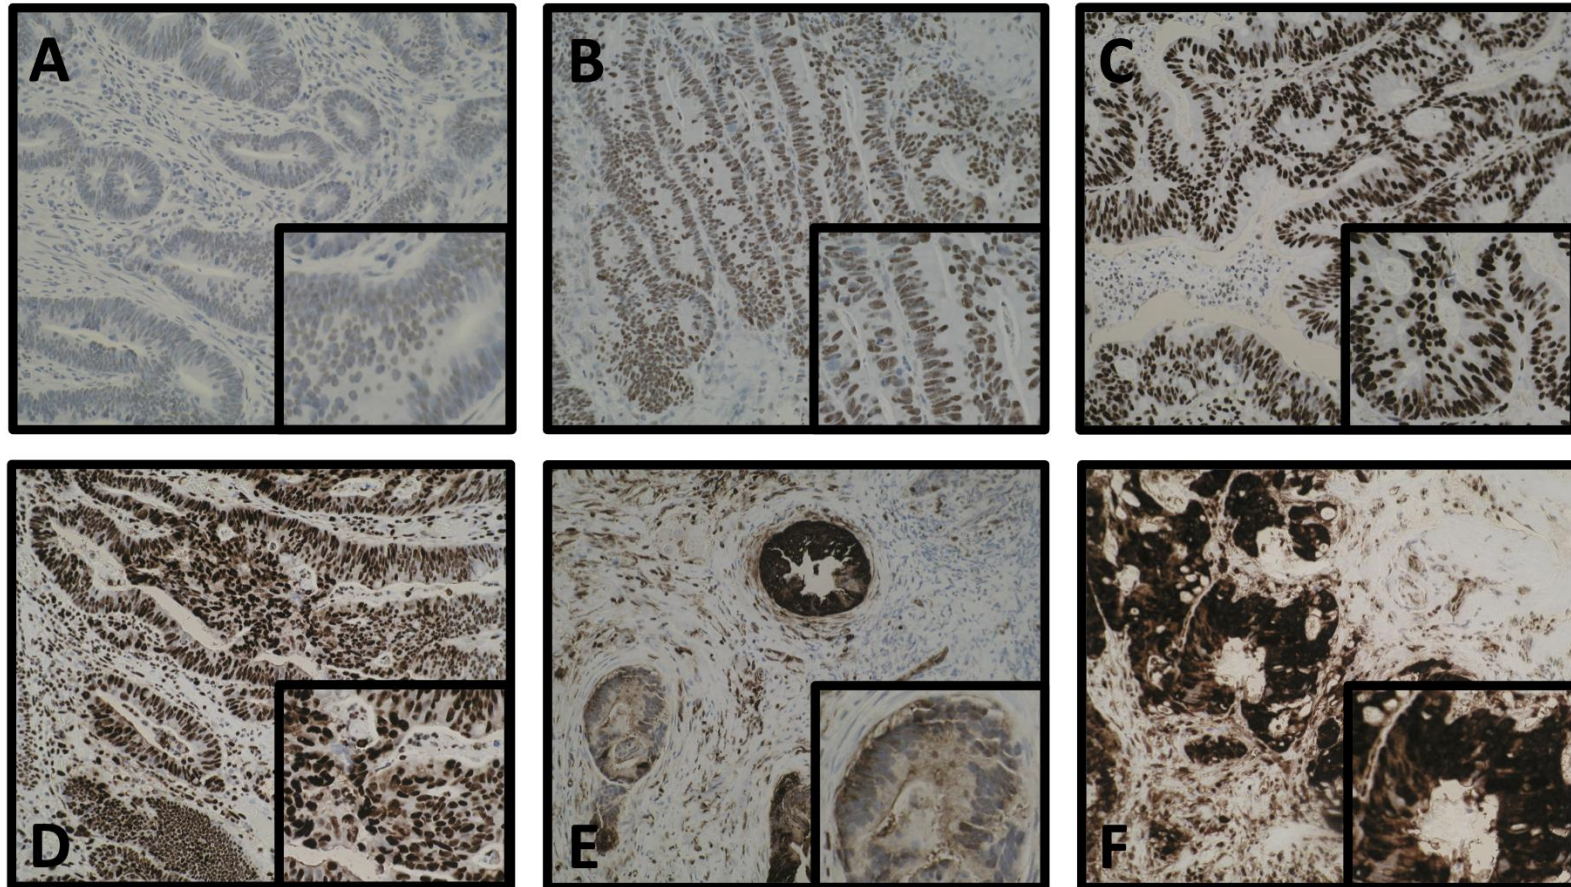

Supplementary File S5 – Table: Association between epithelial HMGB1 expression in colonic cancer and clinico-pathological parameters

| Clinico-Pathological Parameter           | Absent v weak v moderate v strong |              |           |              | Absent v weak, moderate and strong |              |           |              | Absent and weak v moderate and strong |       |           |                  | Strong v absent, weak and moderate |              |           |                  |
|------------------------------------------|-----------------------------------|--------------|-----------|--------------|------------------------------------|--------------|-----------|--------------|---------------------------------------|-------|-----------|------------------|------------------------------------|--------------|-----------|------------------|
|                                          | Nucleus                           |              | Cytoplasm |              | Nucleus                            |              | Cytoplasm |              | Nucleus                               |       | Cytoplasm |                  | Nucleus                            |              | Cytoplasm |                  |
|                                          | $\chi^2$                          | p            | $\chi^2$  | p            | $\chi^2$                           | p            | $\chi^2$  | p            | $\chi^2$                              | p     | $\chi^2$  | p                | $\chi^2$                           | p            | $\chi^2$  | p                |
| Sex                                      | 1.665                             | 0.645        | 9.796     | <b>0.020</b> | 0.229                              | 0.632        | 5.885     | <b>0.015</b> | 0.696                                 | 0.404 | 6.785     | <b>0.009</b>     | 0.092                              | 0.762        | 6.785     | <b>0.009</b>     |
| Age at Surgery (Banded <70, ≥70)         | 1.699                             | 0.637        | 11.281    | <b>0.010</b> | 0.644                              | 0.415        | 3.631     | 0.057        | 0.209                                 | 0.647 | 0.058     | 0.810            | 1.190                              | 0.275        | 0.058     | 0.810            |
| Screening Detected                       | 1.251                             | 0.741        | 2.770     | 0.428        | 0.206                              | 0.650        | 1.216     | 0.270        | 0.000                                 | 0.992 | 2.134     | 0.144            | 0.631                              | 0.427        | 2.134     | 0.144            |
| Tumour Site (colon v rectum)             | 3.532                             | 0.317        | 0.642     | 0.887        | 3.391                              | 0.066        | 0.149     | 0.699        | 2.572                                 | 0.210 | 0.615     | 0.433            | 0.503                              | 0.478        | 0.615     | 0.433            |
| Tumour Site (distal, proximal, rectum)   | 7.317                             | 0.293        | 1.988     | 0.921        | 7.028                              | <b>0.030</b> | 0.621     | 0.733        | 2.541                                 | 0.281 | 0.630     | 0.730            | 1.296                              | 0.523        | 0.630     | 0.730            |
| Tumour Differentiation (poor, mod, well) | 6.243                             | 0.396        | 8.576     | 0.199        | 3.431                              | 0.180        | 4.332     | 0.115        | 4.145                                 | 0.126 | 4.686     | 0.096            | 0.212                              | 0.899        | 4.686     | 0.096            |
| Tumour Differentiation (poor v well/mod) | 5.547                             | 0.136        | 5.460     | 0.141        | 3.414                              | 0.065        | 2.708     | 0.100        | 3.801                                 | 0.051 | 2.299     | 0.129            | 0.201                              | 0.654        | 2.299     | 0.129            |
| EMVI                                     | 3.572                             | 0.312        | 3.251     | 0.355        | 0.266                              | 0.606        | 0.336     | 0.562        | 0.768                                 | 0.381 | 2.884     | 0.089            | 2.334                              | 0.127        | 2.884     | 0.089            |
| Mismatch Repair                          | 11.250                            | <b>0.010</b> | 0.854     | 0.837        | 10.119                             | <b>0.001</b> | 0.007     | 0.933        | 0.485                                 | 0.486 | 0.613     | 0.434            | 0.248                              | 0.619        | 0.613     | 0.434            |
| TNM Stage                                | 59.570                            | <b>0.008</b> | 50.336    | 0.057        | 14.838                             | 0.250        | 15.949    | 0.194        | 14.319                                | 0.281 | 13.267    | 0.350            | 21.495                             | <b>0.044</b> | 13.267    | 0.350            |
| T Stage                                  | 23.272                            | <b>0.006</b> | 8.355     | 0.499        | 10.838                             | <b>0.013</b> | 3.770     | 0.287        | 5.307                                 | 0.151 | 2.603     | 0.457            | 2.608                              | 0.456        | 2.603     | 0.457            |
| N Stage                                  | 10.862                            | 0.093        | 9.934     | 0.127        | 3.462                              | 0.177        | 3.665     | 0.160        | 0.790                                 | 0.674 | 3.530     | 0.171            | 3.094                              | 0.213        | 3.530     | 0.171            |
| Lymph Nodes Positive                     | 47.932                            | 0.596        | 69.919    | <b>0.040</b> | 17.860                             | 0.398        | 15.569    | 0.555        | 13.422                                | 0.708 | 40.627    | <b>&lt;0.001</b> | 11.023                             | 0.855        | 40.627    | <b>&lt;0.001</b> |
| Dukes' Stage                             | 15.551                            | <b>0.016</b> | 8.686     | 0.192        | 5.611                              | 0.600        | 7.764     | <b>0.021</b> | 1.438                                 | 0.487 | 0.789     | 0.674            | 3.526                              | 0.172        | 0.789     | 0.674            |

## Supplementary File S6 - Association between HMGB1 and overall survival in colorectal cancer

Kaplan Meier Survival Analysis for A) nuclear HMGB1 and B) cytoplasmic HMGB1 in the colorectal tissue microarray.

### A) Association between nuclear HMGB1 expression and survival, in colorectal cancer

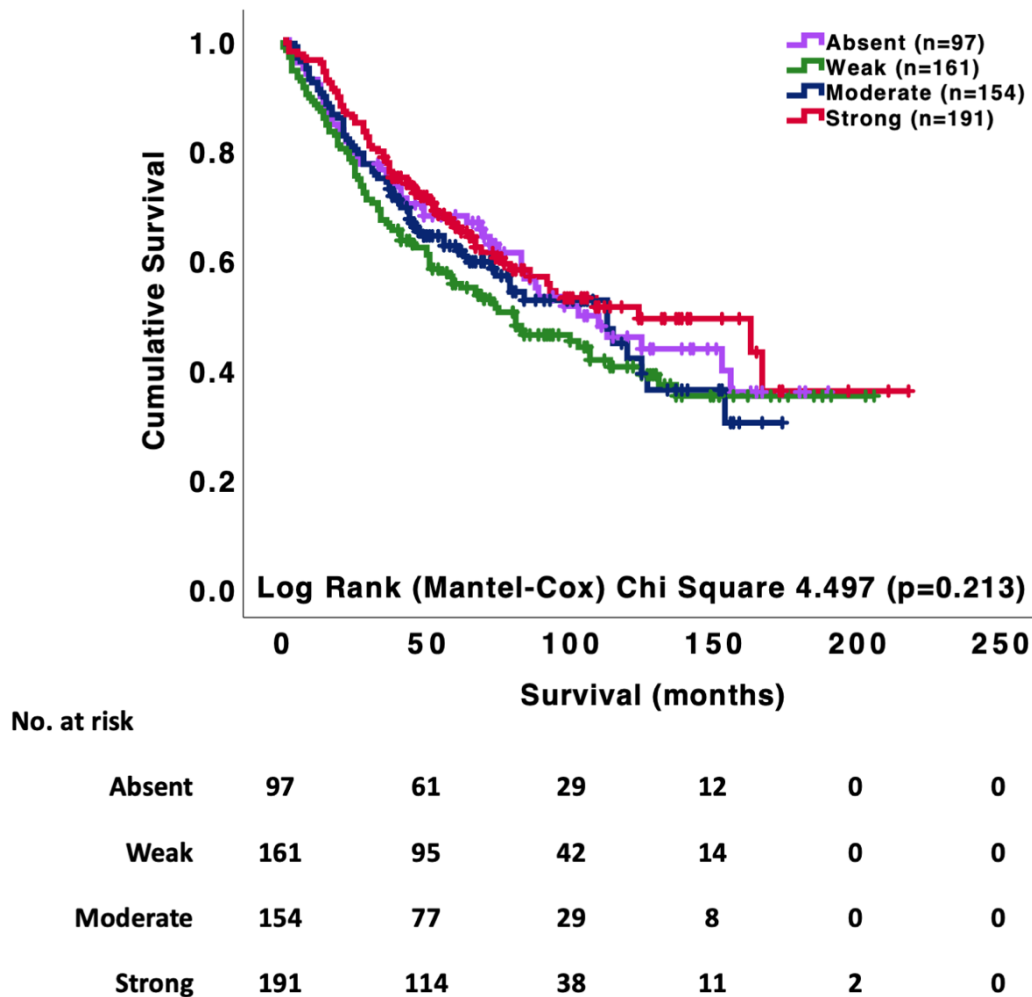



**B)** Association between cytoplasmic HMGB1 expression and survival, in colorectal cancer

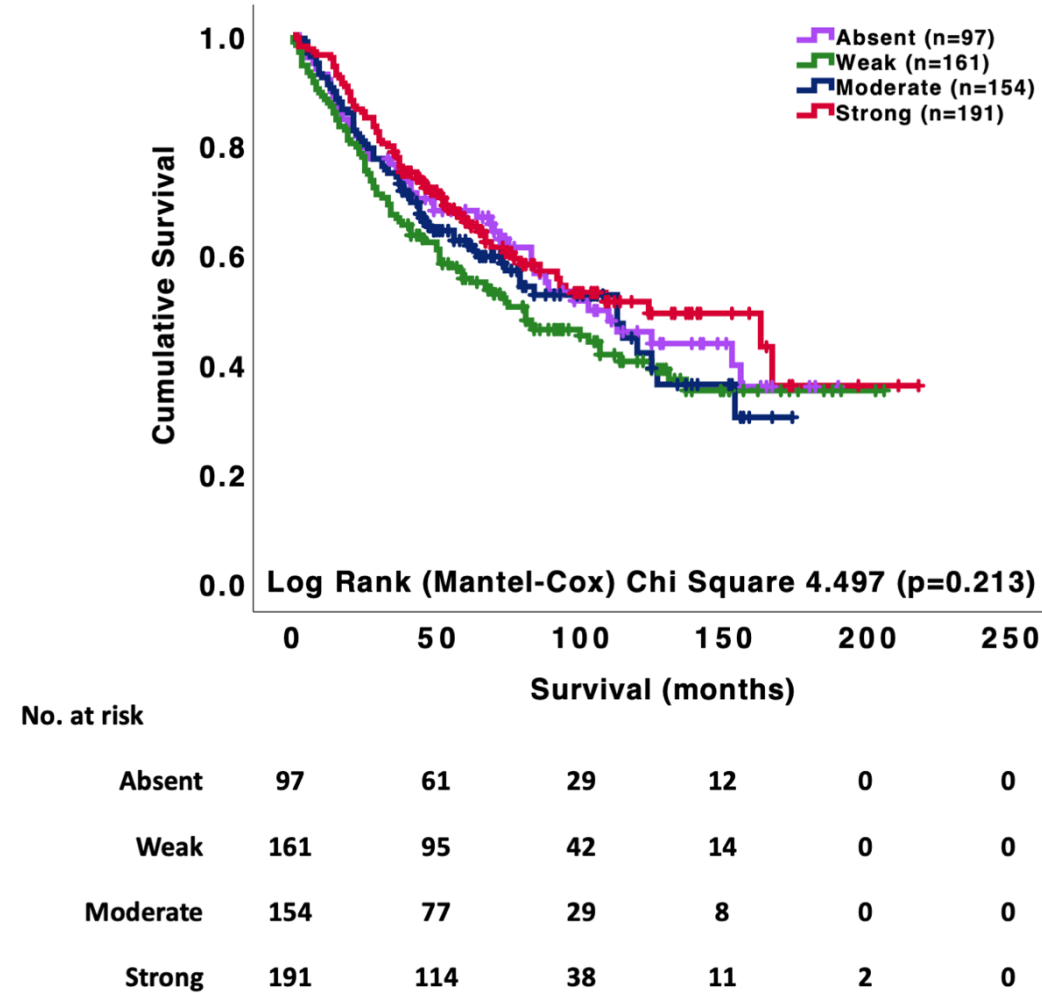

## Supplementary File S7 - Cancer polyp validation cohort

The CaP validation cohort **(B)** demonstrates the same expression pattern of HMGB1 as the initial CaP discovery cohort **(A)**.

### A) Discovery / Initial Cohort

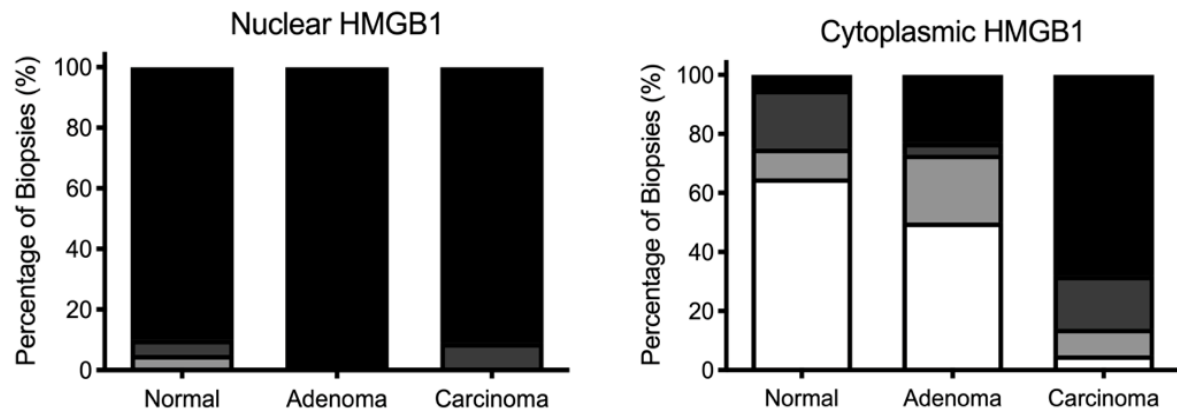

### B) Validation Cohort

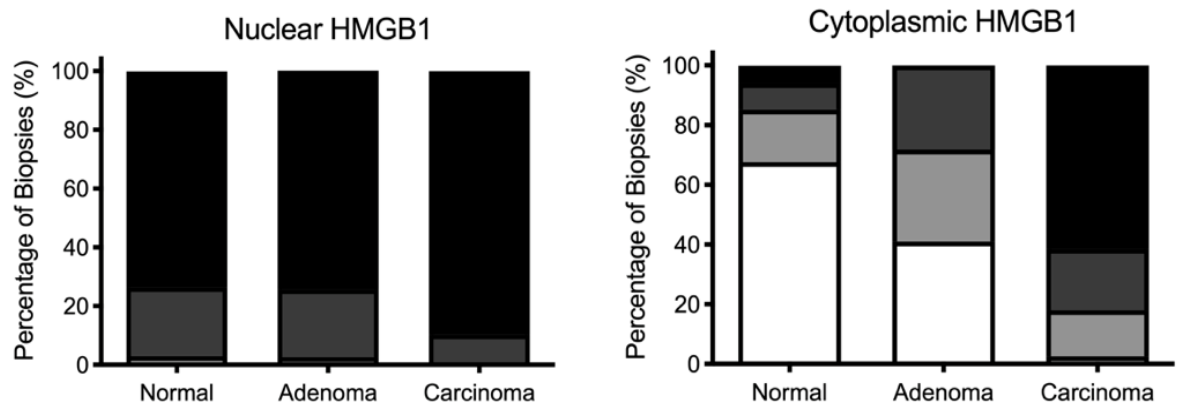

| Comparisons                              | Absent v weak v moderate v strong |       |           |                  | Absent v weak, moderate and strong |   |           |                  | Absent and weak v moderate and strong |       |           |                  | Strong v absent, weak and moderate |       |           |                  |
|------------------------------------------|-----------------------------------|-------|-----------|------------------|------------------------------------|---|-----------|------------------|---------------------------------------|-------|-----------|------------------|------------------------------------|-------|-----------|------------------|
|                                          | Nucleus                           |       | Cytoplasm |                  | Nucleus                            |   | Cytoplasm |                  | Nucleus                               |       | Cytoplasm |                  | Nucleus                            |       | Cytoplasm |                  |
|                                          | $\chi^2$                          | p     | $\chi^2$  | p                | $\chi^2$                           | p | $\chi^2$  | p                | $\chi^2$                              | p     | $\chi^2$  | p                | $\chi^2$                           | p     | $\chi^2$  | p                |
| <b>Cancer Polyps – Initial Cohort</b>    |                                   |       |           |                  |                                    |   |           |                  |                                       |       |           |                  |                                    |       |           |                  |
| Normal v Adenoma                         | 2.310                             | 0.315 | 5.837     | 0.120            | *                                  | * | 0.963     | 0.327            | 1.127                                 | 0.288 | 0.028     | 0.867            | 2.310                              | 0.129 | 2.689     | 0.101            |
| Normal v Carcinoma                       | 1.346                             | 0.510 | 22.491    | <b>&lt;0.001</b> | *                                  | * | 17.230    | <b>&lt;0.001</b> | 1.127                                 | 0.288 | 16.108    | <b>&lt;0.001</b> | 0.010                              | 0.920 | 17.733    | <b>&lt;0.001</b> |
| Adenoma v Carcinoma                      | 2.095                             | 0.148 | 16.419    | <b>0.001</b>     | *                                  | * | 11.458    | <b>0.001</b>     | *                                     | *     | 15.655    | <b>&lt;0.001</b> | 2.095                              | 0.148 | 9.167     | <b>0.002</b>     |
| <b>Cancer Polyps – Validation Cohort</b> |                                   |       |           |                  |                                    |   |           |                  |                                       |       |           |                  |                                    |       |           |                  |
| Normal v Adenoma                         | 0.013                             | 1.000 | 9.530     | <b>0.023</b>     | *                                  | * | 5.174     | <b>0.023</b>     | 0.010                                 | 0.922 | 1.934     | 0.257            | 0.006                              | 0.936 | 2.359     | 0.125            |
| Normal v Carcinoma                       | 3.675                             | 0.159 | 40.904    | <b>&lt;0.001</b> | *                                  | * | 34.865    | <b>&lt;0.001</b> | 1.163                                 | 0.281 | 32.959    | <b>&lt;0.001</b> | 3.263                              | 0.071 | 24.537    | <b>&lt;0.001</b> |
| Adenoma v Carcinoma                      | 3.486                             | 0.175 | 39.709    | <b>&lt;0.001</b> | *                                  | * | 16.924    | <b>&lt;0.001</b> | 1.013                                 | 1.000 | 22.856    | <b>&lt;0.001</b> | 3.134                              | 0.138 | 34.667    | <b>&lt;0.001</b> |

Note. \*no statistics are computed because one variable is a constant.

**Supplementary File S8 - Immune cell infiltrate at the invasive cancer margin of colorectal cancer polyps**

| <b>Immune cell population</b> | <b>Number of CaP</b> | <b>Median number of positive cells (SEM)</b> | <b>25th percentile</b> | <b>75th percentile</b> |
|-------------------------------|----------------------|----------------------------------------------|------------------------|------------------------|
| CD20 <sup>+</sup> B-cells     | 21                   | 46.52 (18.72)                                | 6                      | 35                     |
| CD4 <sup>+</sup> T-cells      | 21                   | 215.38 (31.55)                               | 114                    | 312                    |
| CD8 <sup>+</sup> T-cells      | 21                   | 89.67 (13.58)                                | 44                     | 114                    |
| FOXP3 <sup>+</sup> Tregs      | 21                   | 69.14 (11.06)                                | 25                     | 110                    |
| CD68 <sup>+</sup> macrophages | 19                   | 231.26 (34.03)                               | 106.5                  | 328.5                  |

Supplementary File S9 - Association between immune microenvironment and overall survival in colorectal cancer

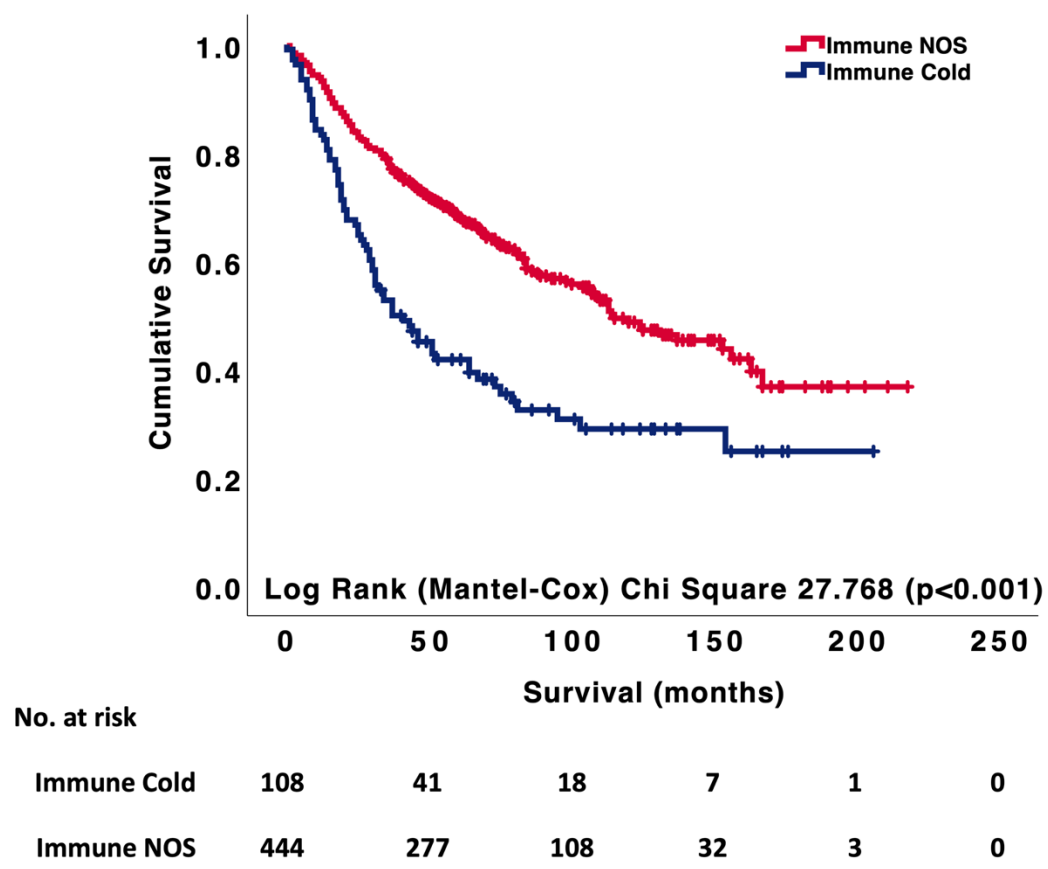

Supplement: s1 [file s1]
